# Supplementary material for: Visible-light excitable, highly transparent and luminescent films with an ultrahigh loading of a europium(III) complex
Source: Royal Society of Chemistry journal article supplement (doi:10.1039/d2tc02266d), 2022-01-01
Supplement: d2tc02266d1.pdf [file d2tc02266d1.pdf]

## Supplementary Information for

### **Visible-light excitable, highly transparent and luminescent films consisted of ultrahighly loaded europium(III) complex**

Yuan Wang<sup>a</sup>, Guangmin Xie<sup>a</sup>, Jinglei Chen<sup>a</sup>, Xiurong Zhang<sup>b</sup>, Cong Chen, Jian Yin<sup>b\*</sup> and Huanrong Li<sup>a\*</sup>

<sup>a</sup>Tianjin Key Laboratory of Chemical Process Safety, School of Chemical Engineering and Technology, Hebei University of Technology, Guangrong Dao 8, Hongqiao District, Tianjin, 300130, PR China

<sup>b</sup>Tianjin Baogang Research Institute of Rare Earths Co., Ltd., Tianjin 300300, China

#### **Corresponding Author**

Jian Yin: yinjian425@sina.com

Huanrong Li: lihuanrong@hebut.edu.cn

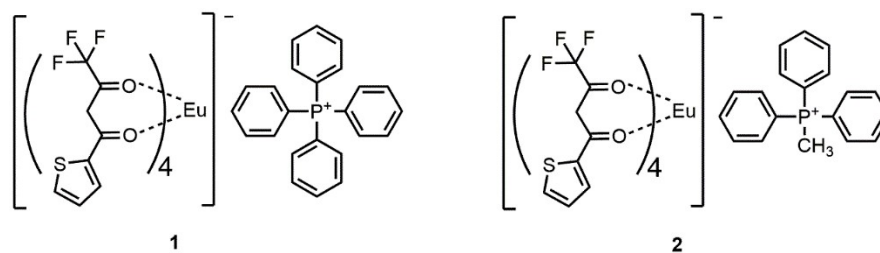

Scheme S1. general formula of complexes **1** and **2**.

**Complex 1.** FT-IR: 1610  $\text{cm}^{-1}$ , 1535  $\text{cm}^{-1}$  ( $\nu_{\text{C=O}}$ ), 1471  $\text{cm}^{-1}$  ( $\nu_{\text{C=C}}$ , benzene ring), 1184  $\text{cm}^{-1}$  ( $\nu_{\text{C-P}}$ ), 1137  $\text{cm}^{-1}$  ( $\nu_{\text{C-F}}$ ), 580  $\text{cm}^{-1}$  ( $\nu_{\text{C=S}}$ , thiophene ring);  $^1\text{H NMR}$  (400 MHz,  $\text{CDCl}_3$ ,  $\delta$ ): 9.26-9.16 (d, 16H), 8.79 (s, 1H), 6.87-6.79 (d, 8H), 6.58 (s, 4H), 4.03 (s, 1H). Anal. calcd: C 48.69, H 2.61; found: C 47.90, H 2.13.

**Complex 2.** FT-IR: 1608  $\text{cm}^{-1}$ , 1535  $\text{cm}^{-1}$  ( $\nu_{\text{C=O}}$ ), 1473  $\text{cm}^{-1}$  ( $\nu_{\text{C=C}}$ , benzene ring), 1184  $\text{cm}^{-1}$  ( $\nu_{\text{C-P}}$ ), 1139  $\text{cm}^{-1}$  ( $\nu_{\text{C-F}}$ ), 578  $\text{cm}^{-1}$  ( $\nu_{\text{C=S}}$ , thiophene ring);  $^1\text{H NMR}$  (400 MHz,  $\text{CDCl}_3$ ,  $\delta$ ): 10.36 (m, 6H), 8.65-8.49 (m, 9H), 7.08 (d, 4H), 6.87 (s, 4H), 6.67 (s, 4H), 4.80 (s, 3H), 3.56 (s, 4H). Anal. calcd: C 46.43, H 2.58; found: C 45.89, H 2.12.

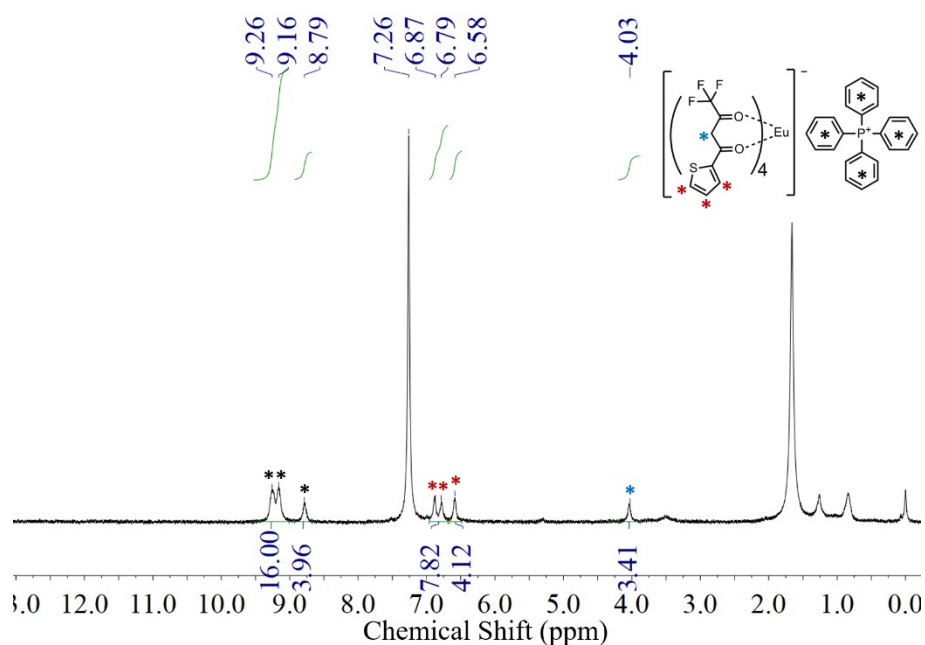

Figure S1.  $^1\text{H NMR}$  spectrum of complex **1** ( $\text{CDCl}_3$ , 400 MHz, 25  $^\circ\text{C}$ ).

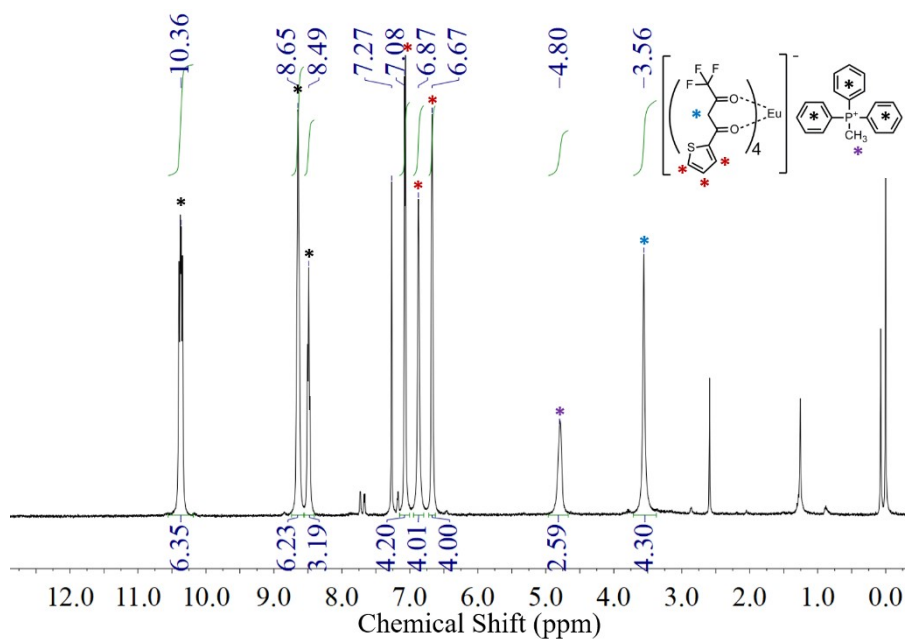

Figure S2.  $^1\text{H}$  NMR spectrum of complex **2** ( $\text{CDCl}_3$ , 400 MHz, 25 °C).

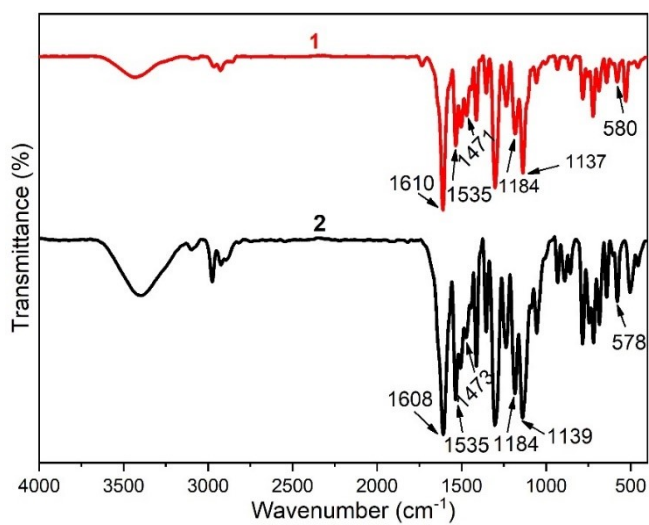

Figure S3. FT-IR spectra of complexes **1** and **2**.

Table S1. Single crystal data of complex 1.

|                                             |                                                                                  |
|---------------------------------------------|----------------------------------------------------------------------------------|
| Empirical formula                           | C <sub>56</sub> H <sub>36</sub> EuF <sub>12</sub> O <sub>8</sub> PS <sub>4</sub> |
| Formula weight                              | 1376.02                                                                          |
| Temperature/K                               | 109 (15)                                                                         |
| Crystal system                              | triclinic                                                                        |
| Space group                                 | $\bar{1}$                                                                        |
| a/Å                                         | 12.5388 (5)                                                                      |
| b/Å                                         | 14.6688 (6)                                                                      |
| c/Å                                         | 16.2920 (7)                                                                      |
| $\alpha$ /°                                 | 84.687 (3)                                                                       |
| $\beta$ /°                                  | 83.102 (3)                                                                       |
| $\gamma$ /°                                 | 77.416 (3)                                                                       |
| Volume/Å <sup>3</sup>                       | 2896.6 (2)                                                                       |
| Z                                           | 2                                                                                |
| $\rho_{\text{calc}}$ /cm <sup>3</sup>       | 1.578                                                                            |
| $\mu$ /mm <sup>-1</sup>                     | 10.165                                                                           |
| F (000)                                     | 1372.0                                                                           |
| Crystal size/mm <sup>3</sup>                | 0.12 × 0.11 × 0.1                                                                |
| Radiation                                   | Cu K $\alpha$ ( $\lambda$ = 1.54184)                                             |
| 2 $\Theta$ range for data collection/°      | 7.98 to 152.3                                                                    |
| Index ranges                                | -15 ≤ h ≤ 14, -14 ≤ k ≤ 18, -20 ≤ l ≤ 19                                         |
| Reflections collected                       | 28843                                                                            |
| Independent reflections                     | 11 592 [R <sub>int</sub> = 0.0741, R <sub>sigma</sub> = 0.0672]                  |
| Data/restraints/parameters                  | 11592/795/904                                                                    |
| Goodness-of-fit on F <sup>2</sup>           | 1.047                                                                            |
| Final R indexes [I ≥ 2 $\sigma$ (I)]        | R <sub>1</sub> = 0.0903, wR <sub>2</sub> = 0.2405                                |
| Final R indexes [all data]                  | R <sub>1</sub> = 0.1013, wR <sub>2</sub> = 0.2469                                |
| Largest diff. peak/hole / e Å <sup>-3</sup> | 3.11/-2.16                                                                       |
| CCDC                                        | 2087952                                                                          |

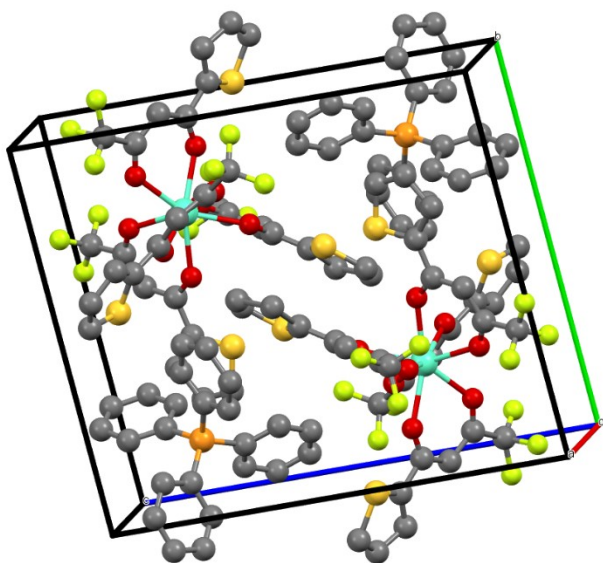

Figure S4. The view of the crystal packing of complex 1.

Table S2. Selected bond lengths (Å) and angles (°) for complex 1.

|             |            |             |            |
|-------------|------------|-------------|------------|
| Eu1-O13     | 2.361(5)   | Eu1-O16     | 2.358(6)   |
| Eu1-O14     | 2.409(6)   | Eu1-O17     | 2.379(6)   |
| Eu1-O15     | 2.402(6)   | Eu1-O18     | 2.389(5)   |
| Eu1-O19     | 2.395(6)   | Eu1-O20     | 2.381(6)   |
| O13-Eu1-O14 | 71.54(19)  | O13-Eu1-O15 | 75.5(2)    |
| O13-Eu1-O17 | 71.70(19)  | O13-Eu1-O18 | 89.55(19)  |
| O13-Eu1-O19 | 137.4(2)   | O13-Eu1-O20 | 149.1(2)   |
| O15-Eu1-O14 | 135.14(19) | O16-Eu1-O13 | 106.1(2)   |
| O16-Eu1-O14 | 72.53(19)  | O16-Eu1-O15 | 147.3(2)   |
| O16-Eu1-O17 | 72.98(19)  | O16-Eu1-O18 | 134.64(19) |
| O16-Eu1-O19 | 89.9(2)    | O16-Eu1-O20 | 72.3(2)    |
| O17-Eu1-O14 | 118.8(2)   | O17-Eu1-O15 | 76.9(2)    |
| O17-Eu1-O18 | 151.22(19) | O17-Eu1-O19 | 76.1(2)    |
| O17-Eu1-O20 | 132.99(19) | O18-Eu1-O14 | 72.80(19)  |
| O18-Eu1-O15 | 77.4(2)    | O18-Eu1-O19 | 107.0(2)   |
| O19-Eu1-O14 | 150.5(2)   | O19-Eu1-O15 | 70.6(2)    |
| O20-Eu1-O14 | 78.8(2)    | O20-Eu1-O15 | 123.0(2)   |
| O20-Eu1-O18 | 73.0(2)    | O20-Eu1-O19 | 73.2(2)    |

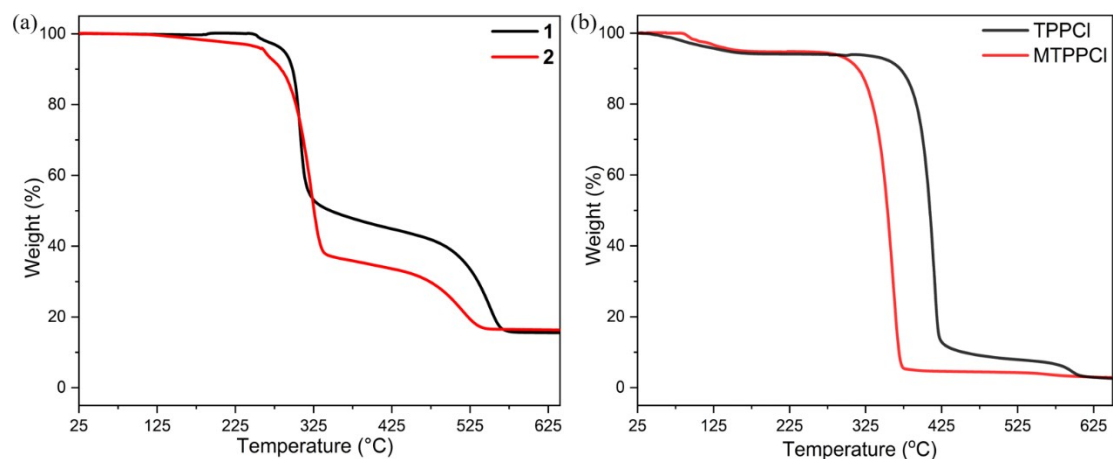

Figure S5. Thermal gravimetric analysis curves of the (a) complexes **1** and **2** and (b) TPPCl and MTPPcI.

The thermal stability of complexes **1** and **2** was performed in Figure S5a. It can be found that they exhibit the similar destruction trends. Take complex **1** as an example, there is no significant weight loss within the temperature range of 25-250 °C, indicating that the absence of H<sub>2</sub>O and solvent molecules in the complex. Further heating above 250 °C leads to the decomposition of the complex. The decomposition consists of three weight losses in the steps around 250-335, 335-480 and 480-570 °C. Due to the main thermal decomposition observed to be >350 °C for TPPCl (Figure S5b), it is speculated that the first stage can be signed to the loss of TTA and another two step one corresponds to the loss of the mixture of TTA and TPP<sup>+</sup>, respectively.

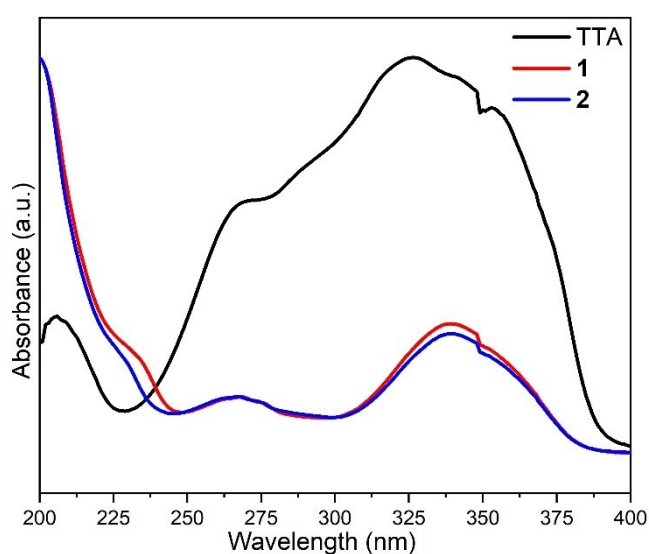

Figure S6. UV-vis absorption spectra of the ligand TTA and the complexes **1** and **2** in ethanol solution at room temperature.

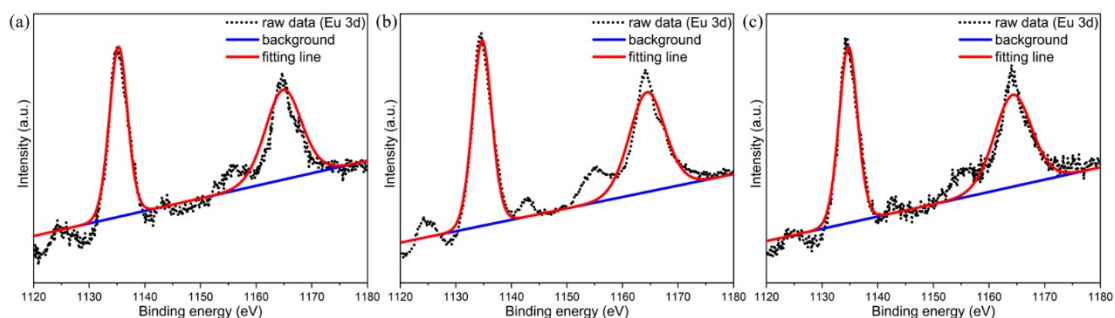

Figure S7. High-resolution XPS fitting result for the Eu 3d spectrum of complexes **1** (a), **2** (b) and **3** (c).

Table S3. Binding energy values of O 1s and Eu 3d.

| Complexes | Eu 3d (eV)        |
|-----------|-------------------|
| <b>1</b>  | 1 134.71/1 164.30 |
| <b>2</b>  | 1 134.73/1 164.43 |
| <b>3</b>  | 1 135.25/1 164.89 |

Calculation of nonradiative rate constant  $k_{nr}$  and radiative rate constant  $k_r$ :

$$K_{nr} = \frac{1}{\tau_{obs}} - \frac{1}{\tau_{rad}} \quad (\text{eq S1})$$

$$K_r = \frac{1}{\tau_{rad}} = A_{MD,0} \cdot n^3 \cdot \left( \frac{I_{tot}}{I_{MD}} \right) \quad (\text{eq S2})$$

Where  $\tau_{obs}$  is the observed emission lifetime determined by experiment.  $\tau_{rad}$  is the radiative lifetimes of  $\text{Eu}^{3+}$ , being obtained from equations S2.  $A_{MD}$  is the spontaneous emission probability of the  ${}^5\text{D}_0 \rightarrow {}^7\text{F}_1$  transition being  $14.65 \text{ s}^{-1}$  in vacuo and  $n$  means the refractive index of the medium that is equal to 1.5 in the calculation.  $I_{tot}/I_{MD}$  signifies the ratio of the integrated emission spectrum and the integrated intensity of the  ${}^5\text{D}_0 \rightarrow {}^7\text{F}_1$  transition.

Table S4. Photophysical data for the complexes **1**, **2** and **3**.

| Complexes | $I_{tot}/I_{MD}$ | $\tau_{obs}$ (ms) | $\tau_{rad}$ (ms) | $K_r$ ( $\text{s}^{-1}$ ) | $K_{nr}$ ( $\text{s}^{-1}$ ) | $\Phi_{tot}$ (%) |
|-----------|------------------|-------------------|-------------------|---------------------------|------------------------------|------------------|
| <b>1</b>  | 20.91            | 0.436             | 0.967             | 1033.87                   | 1 259.45                     | 59.72            |
| <b>2</b>  | 18.41            | 0.418             | 1.099             | 910.25                    | 1 482.42                     | 61.05            |

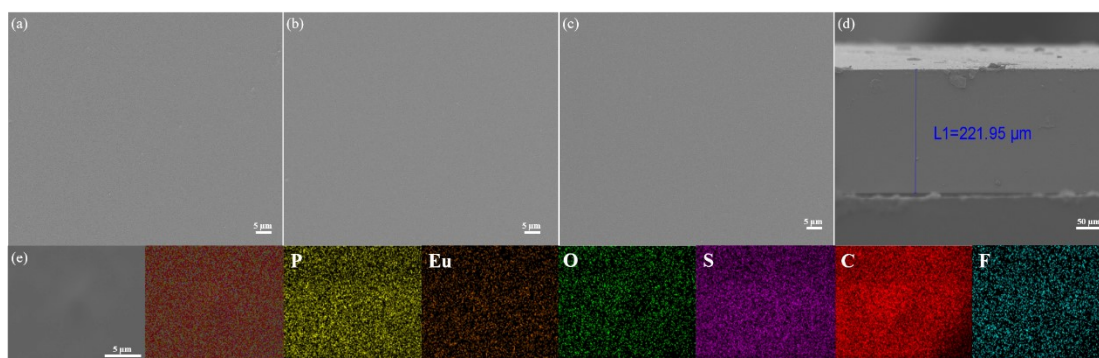

Figure S8. (a-c) SEM surface morphology of the luminescent films containing 5 wt %, 50 wt % and 80 wt % loading contents of complex **1**. (d) Cross-sectional morphology and (e) EDX mapping of the luminescent film with 80 wt % loading content of complex **1**.

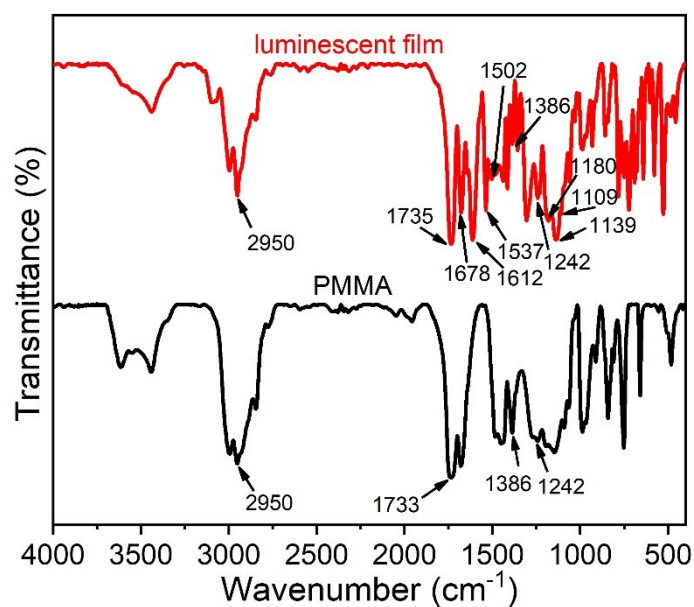

Figure S9. FT-IR spectra of PMMA and luminescent film with 50 wt % loading content of complex **1**.



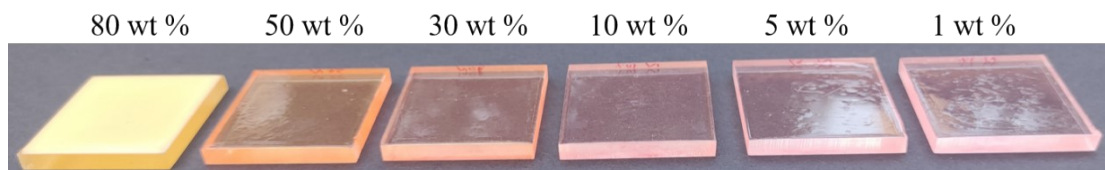

Figure S10. Digital photographs of the luminescent film with different contents of complex **3** under day light.

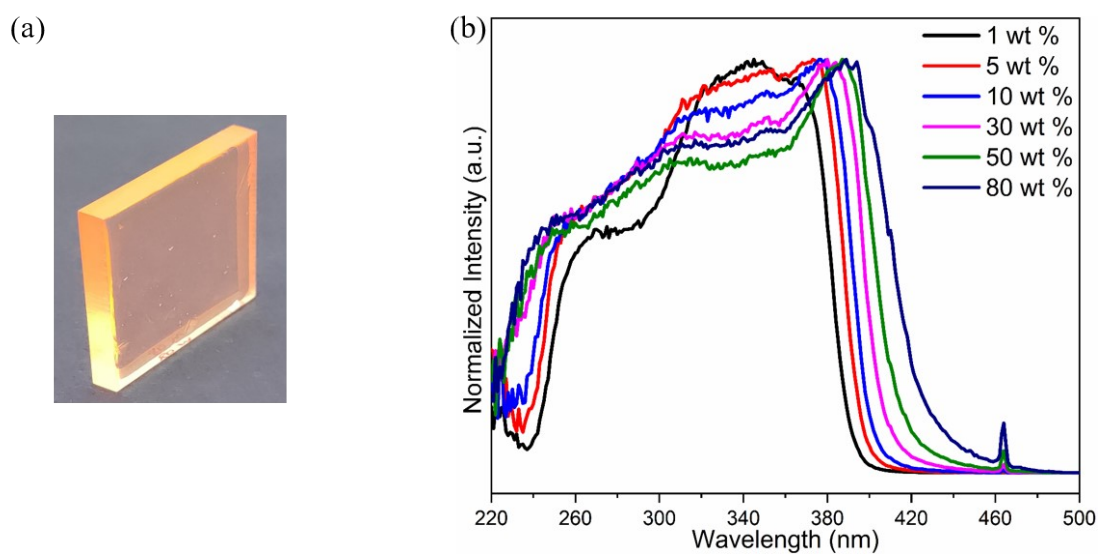

Figure S11. (a) Digital photographs of the luminescent film with complex **2** loading content of 80 wt %; (b) Excitation spectra of the luminescent films with different contents of complex **2**.

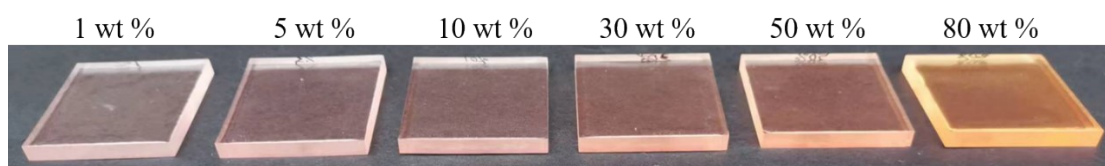

Figure S12. Digital photographs of the luminescent film with different contents of complex **1** under day light.

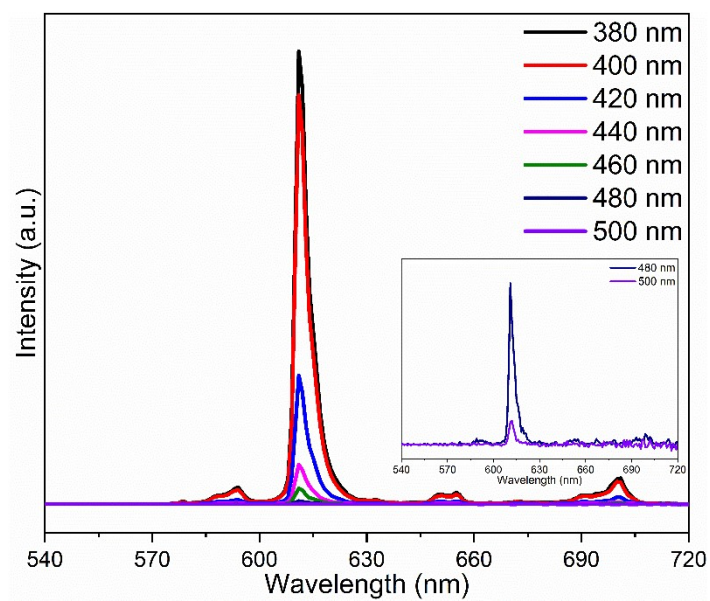

Figure S13. The emission spectra of the luminescent films with 80 wt % content of the complex **1** under the different excitation wavelength.

Table S5. Photophysical data for the luminescent films with different content of complex **1**.

|                          | 1 wt % | 5 wt % | 10 wt % | 30 wt % | 50 wt % | 80 wt % |
|--------------------------|--------|--------|---------|---------|---------|---------|
| $\tau_{\text{obs}}$ (ms) | 0.49   | 0.47   | 0.48    | 0.49    | 0.47    | 0.43    |
| $\Phi_{\text{tot}}$ (%)  | 65.44% | 61.67% | 66.92%  | 60.03%  | 64.92%  | 62.52%  |

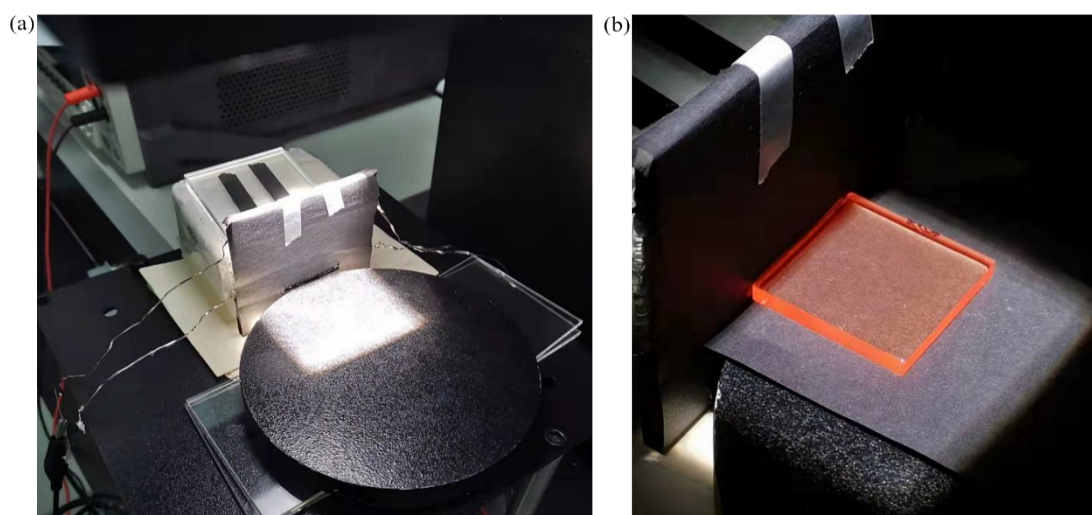

Figure S14. Schematic diagrams of the setup in measuring the  $J$ - $V$  performance of the LSC.

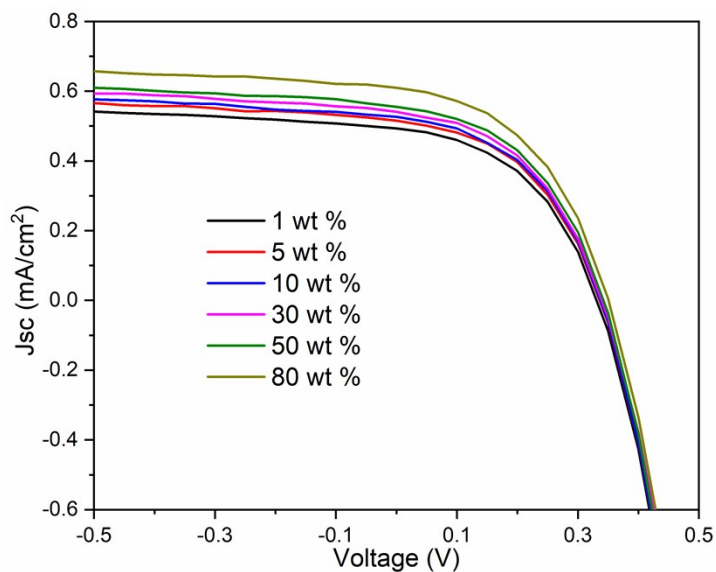

Figure S15.  $J$ - $V$  curves of the LSC with different contents of complex **1**.

Table S6. Performance parameters of the LSC with different contents of complex **1**.

| LSC     | $V_{OC}$ (V) | $J_{SC}$ (mA/cm <sup>2</sup> ) | FF (%) | $P_{out}$<br>(mW) | PCE (%) | $\eta_{opt}$ (%) |
|---------|--------------|--------------------------------|--------|-------------------|---------|------------------|
| 0 wt %  | 0.30         | 0.44                           | 49.05  | 0.59              | 0.065   | 3.94             |
| 1 wt %  | 0.30         | 0.49                           | 50.20  | 0.67              | 0.074   | 4.37             |
| 5 wt %  | 0.30         | 0.52                           | 51.24  | 0.71              | 0.079   | 4.57             |
| 10 wt % | 0.30         | 0.53                           | 50.98  | 0.72              | 0.081   | 4.67             |
| 30 wt % | 0.30         | 0.54                           | 51.29  | 0.75              | 0.083   | 4.79             |
| 50 wt % | 0.30         | 0.55                           | 51.71  | 0.77              | 0.086   | 4.92             |
| 80 wt % | 0.30         | 0.61                           | 44.83  | 0.86              | 0.096   | 5.40             |

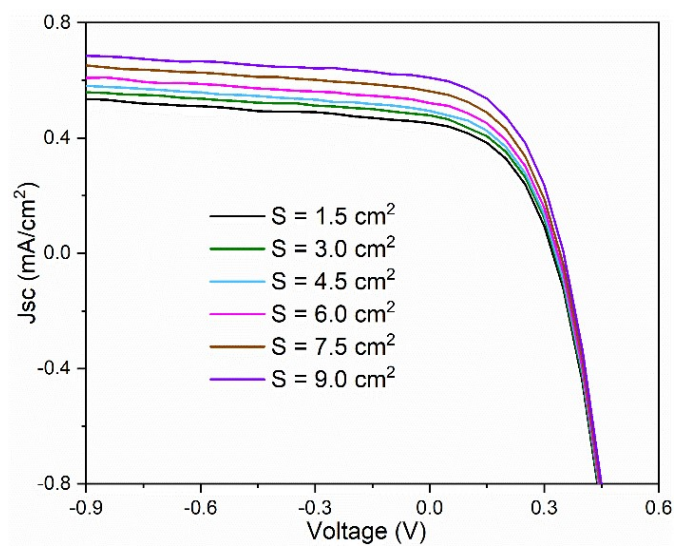

Figure S16.  $J$ - $V$  curves of the LSC (80 wt % loading content of complex 1) with different illuminated areas.
